# Supplementary material
Source: PubMed Central journal article supplement (PMC5026617)
Supplement: NIHMS806236-supplement-308687R3_Acknowledgment_Permission.pdf [file NIHMS806236-supplement-308687R3_Acknowledgment_Permission.pdf]

## Circulation Research

---

**From:** stupchong@comcast.net  
**Sent:** Friday, July 22, 2016 10:40 AM  
**To:** circulation.research@circresearch.com  
**Subject:** Permission for Acknowledgement in CIRCRES/2016/308687R2

Hello,

My name is Sarah Anne Tupchong and I give permission to be acknowledged in CIRCRES/2016/308687R2: Acute Catecholamine Exposure Causes Reversible Myocyte Injury without Cardiac Regeneration.

Thank you so much,  
Sarah Tupchong
